# Supplementary material for: Analysis of miR-29 Serum Levels in Patients with Neuroendocrine Tumors—Results from an Exploratory Study
Source: MDPI journal article supplement (doi:10.3390/jcm9092881), 2020-09-06
Supplement: s1 [file s1]

Supplementary Material

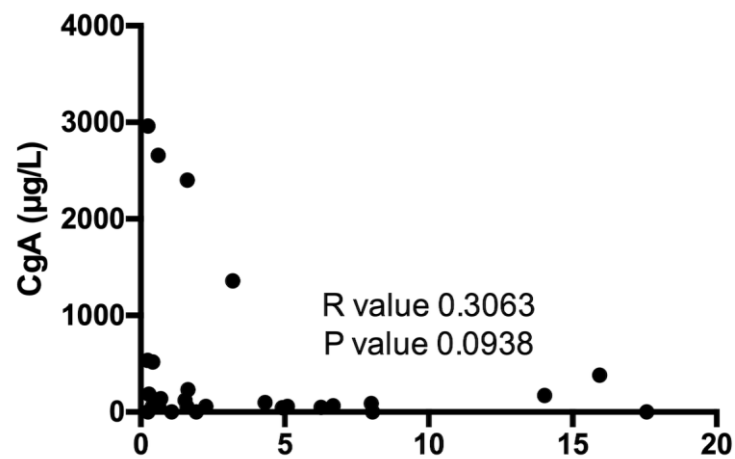

**Supplementary Figure 1.** Speerman rank analysis of chromogranin A and relative miR-29b expression.

Spearman rank analysis does not reveal a significant correlation between chromogranin A (CgA) values and relative miR-29b concentration in serum levels of NET patients ( $P = 0.0938$ ,  $R = 0.3063$ )
